# Supplementary material for: N-doped TiO2 anatase nanoparticles as a highly sensitive gas sensor for NO2 detection: insights from DFT computations
Source: Royal Society of Chemistry journal article supplement (doi:10.1039/c6en00159a), 2016-01-01
Supplement: c6en00159a1.pdf [file c6en00159a1.pdf]

# **N-doped TiO<sub>2</sub> anatase nanoparticle as a highly sensitive gas sensor for NO<sub>2</sub> detection: Insights from DFT computations**

Amirali Abbasi <sup>1, 2, 3\*</sup> and Jaber Jahanbin Sardroodi <sup>1, 2, 3</sup>

1. Molecular Simulation laboratories (MSL), Azarbaijan Shahid Madani University, Tabriz, Iran
2. Computational Nanomaterials research group, Azarbaijan Shahid Madani University, Tabriz, Iran
3. Chemistry Department, Faculty of Basic Sciences, Azarbaijan Shahid Madani University, Tabriz, Iran

\* Corresponding Author, Tel: +98-412-432-7541; Email: [a\\_abbasi@azaruniv.edu](mailto:a_abbasi@azaruniv.edu)

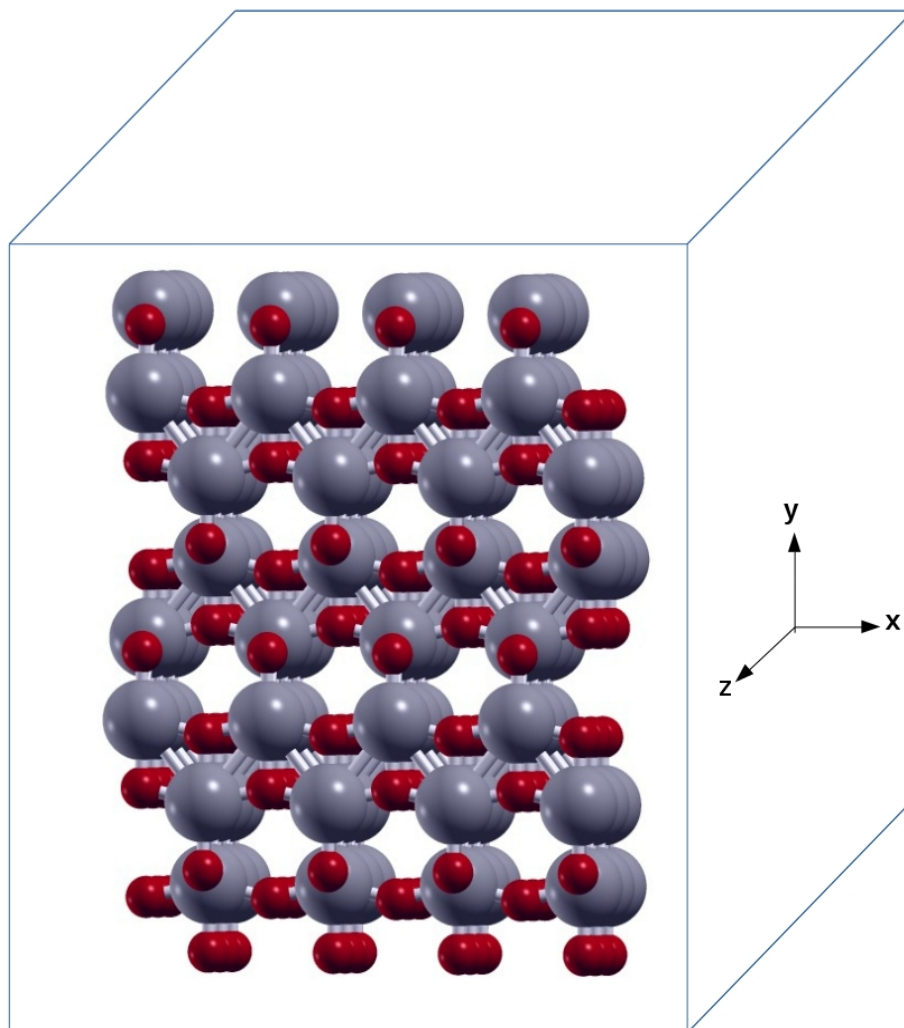

**Figure S1.** Representation of  $3\times 2\times 1$  supercell of the  $\text{TiO}_2$  anatase constructed from the  $\text{TiO}_2$  unit cells along x, y and z directions. The grey and blue balls denote titanium and nitrogen atoms, respectively.

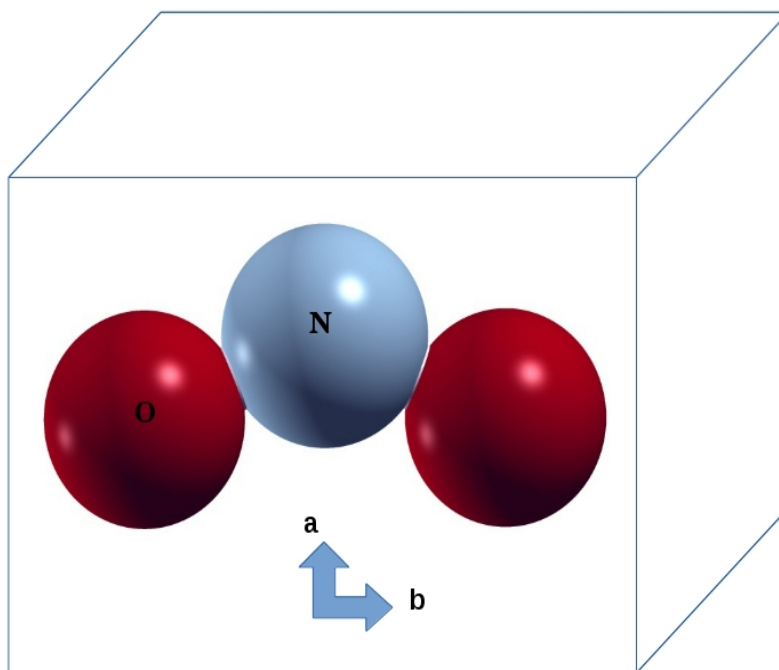

**Figure S2.** Schematic representation of the  $\text{NO}_2$  molecule structure located in a large cubic supercell. The red and blue balls denote oxygen and nitrogen atoms, respectively.

**NO<sub>2</sub> adsorption on the Ti-5f site (Bridging configuration)**

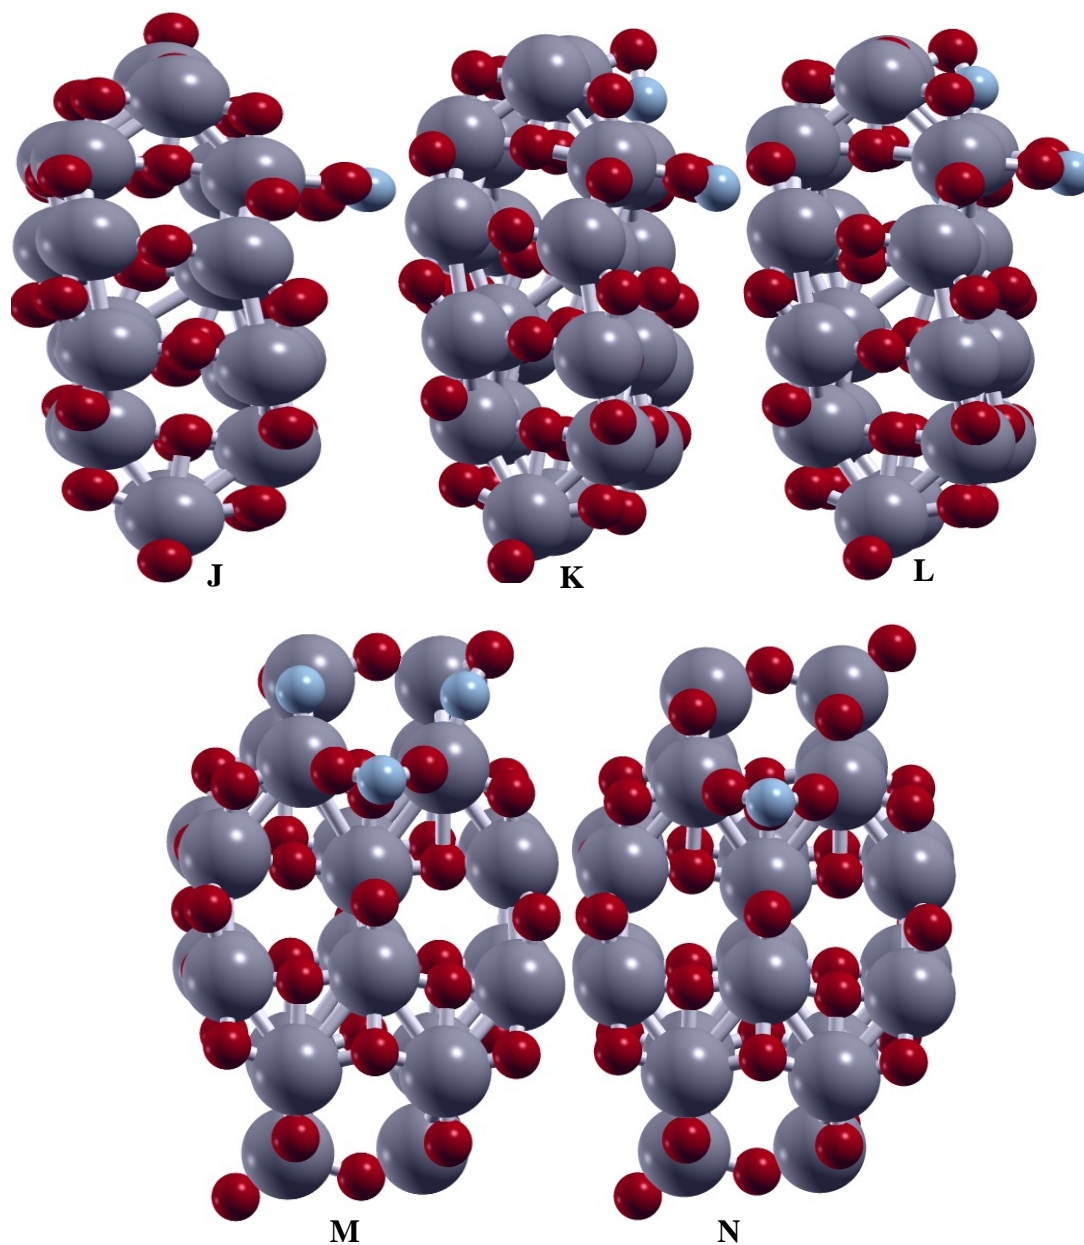

**Figure S3.** Optimized structures of the NO<sub>2</sub> molecule adsorbed on the TiO<sub>2</sub> anatase nanoparticles with nitrogen atom of the NO<sub>2</sub> molecule positioned towards the fivefold coordinated titanium atom of the nanoparticle.



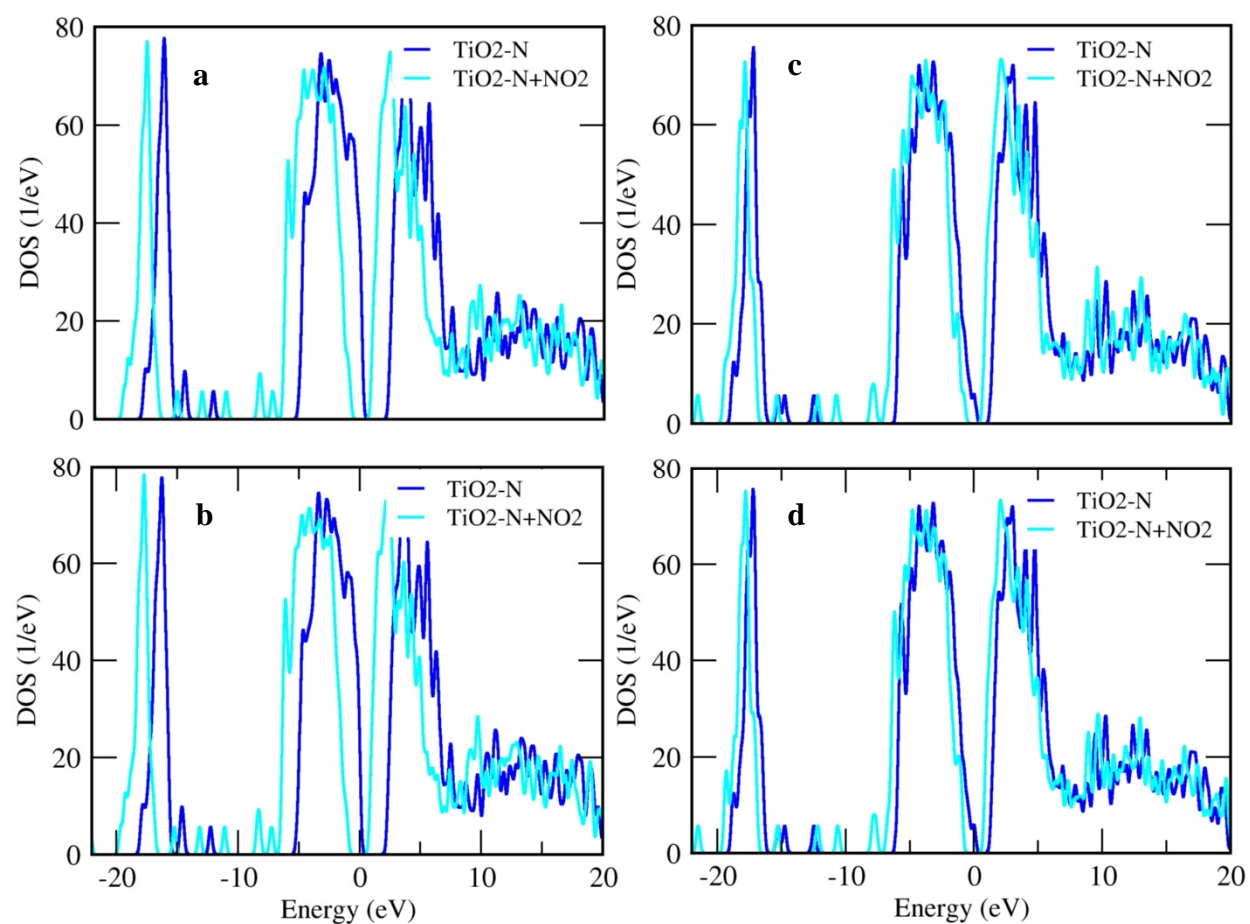

**Figure S4.** The total density of states (TDOS) of the  $\text{NO}_2$  molecule adsorbed on the dangling oxygen site of the  $\text{TiO}_2$  nanoparticle (the structures are shown in Figure 5). (a) Complex A; (b) Complex B; (c) Complex C; (d) Complex D. The Fermi level is set to 0 eV.

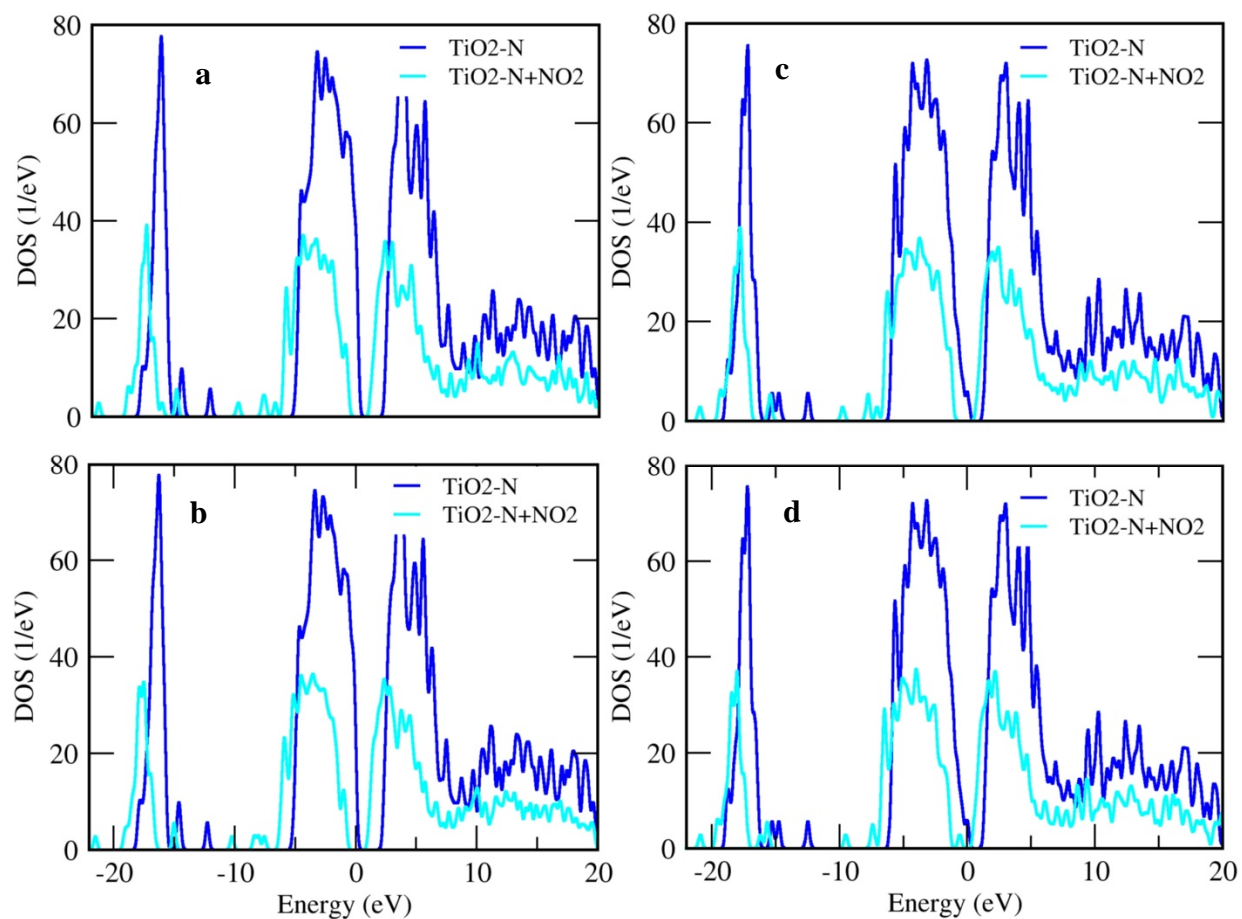

**Figure S5.** The total density of states (TDOS) of the  $\text{NO}_2$  molecule adsorbed on the doped nitrogen site of the  $\text{TiO}_2$  nanoparticle. (a) Complex F; (b) Complex G; (c) Complex H; (d) Complex I (the structures are shown in Figure 5). The Fermi level is set to 0 eV.

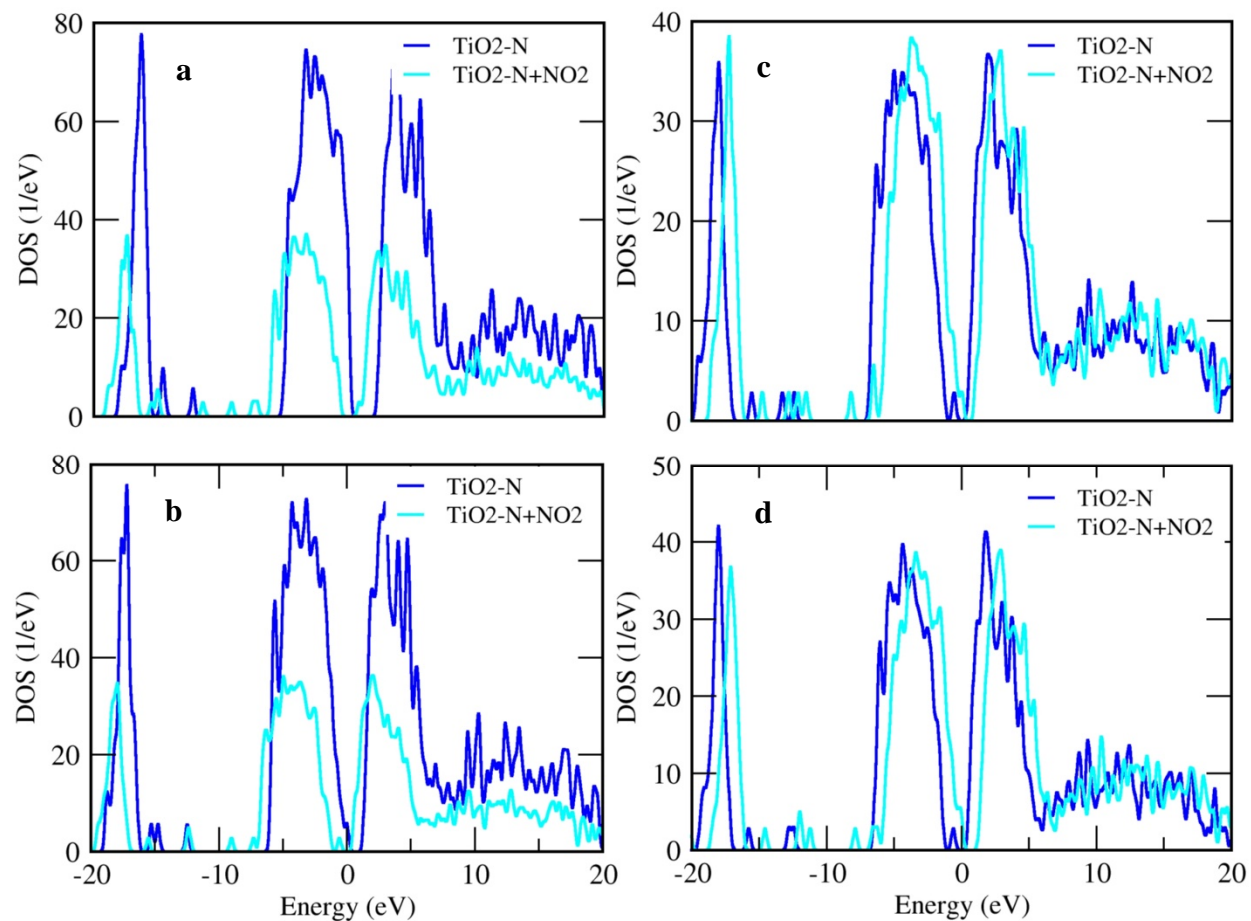

**Figure S6.** The total density of states (TDOS) of / the NO<sub>2</sub> molecule adsorbed on the fivefold coordinated titanium site of the TiO<sub>2</sub> nanoparticle. (a) Complex J; (b) Complex K; (c) Complex L; (d) Complex M. The Fermi level is set to 0 eV.

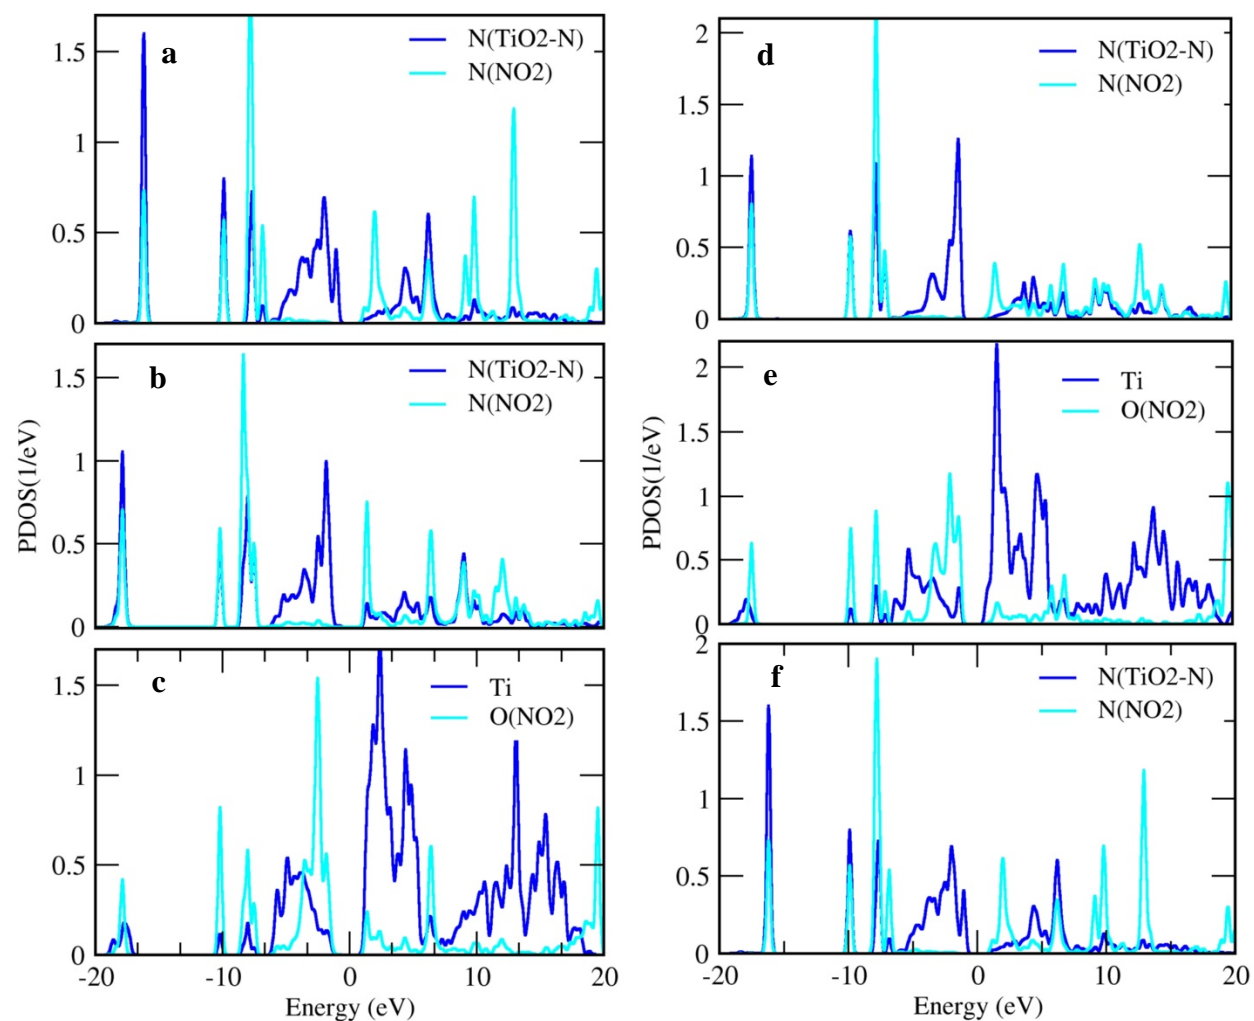

**Figure S7.** The projected density of states (PDOS) of the  $\text{NO}_2$  molecule adsorbed on the doped nitrogen site of  $\text{TiO}_2$  anatase nanoparticle. (a) Complex F; (b) Complex G; (c) Complex G; (d) Complex H; (e) Complex H; (f) Complex I.

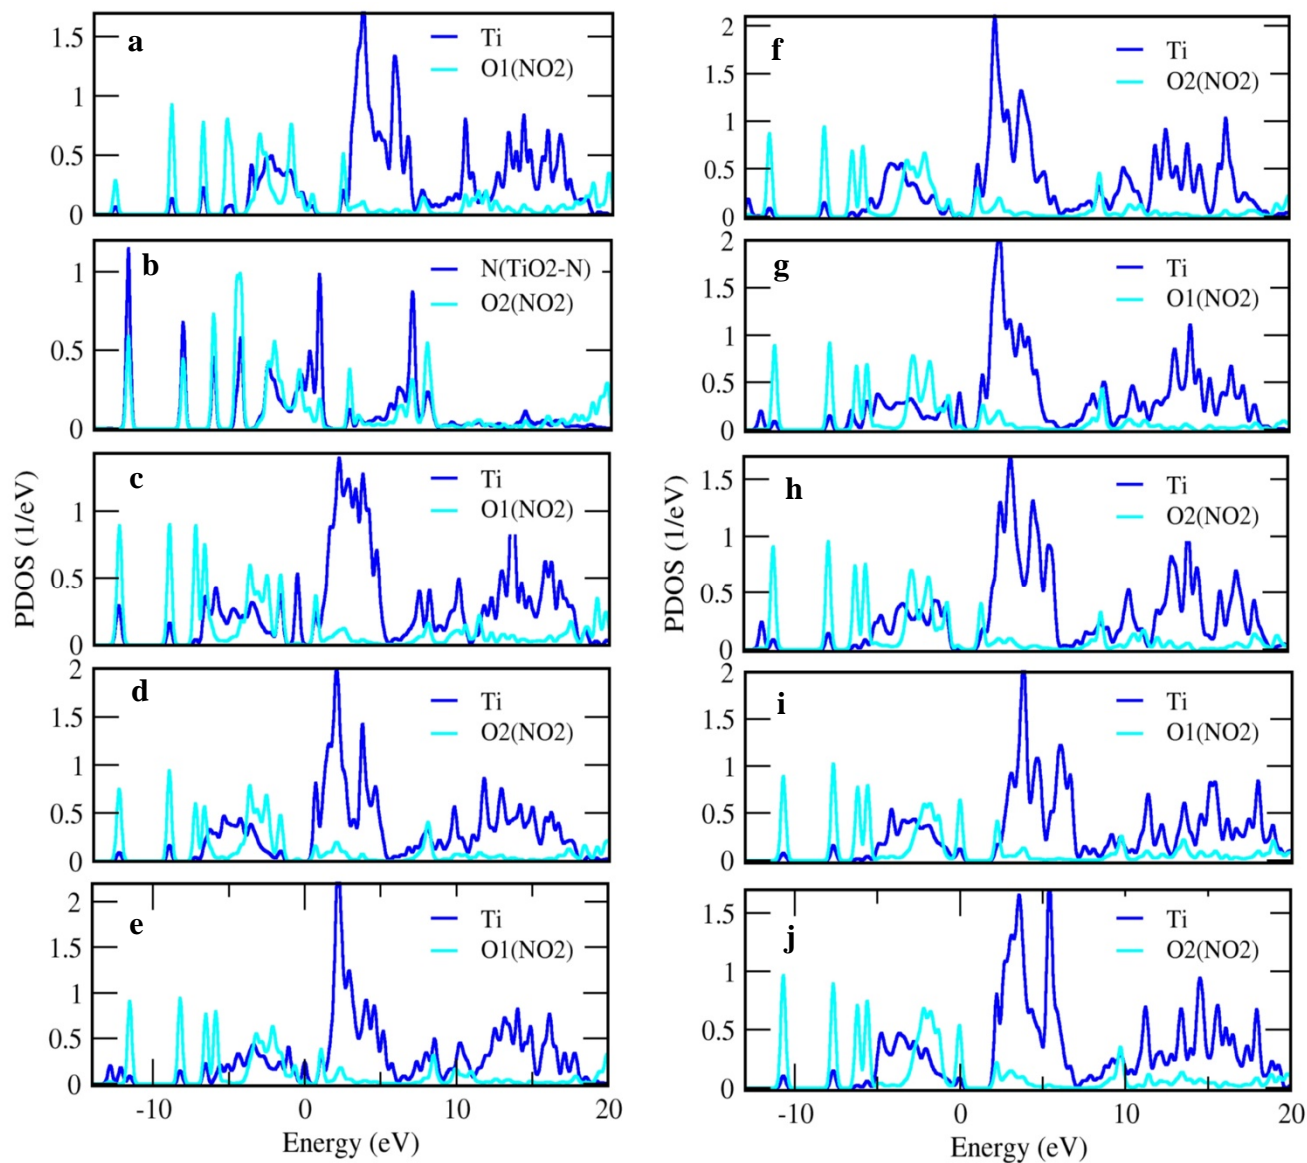

**Figure S8.** The projected density of states (PDOS) of the NO<sub>2</sub> molecule adsorbed on the fivefold coordinated titanium site of TiO<sub>2</sub> nanoparticle, (a) Complex J; (b) Complex J; (c) Complex K; (d) Complex K; (e) Complex L; (f) Complex L; (g) Complex M; (h) Complex M; (i) Complex N; (j) Complex N.

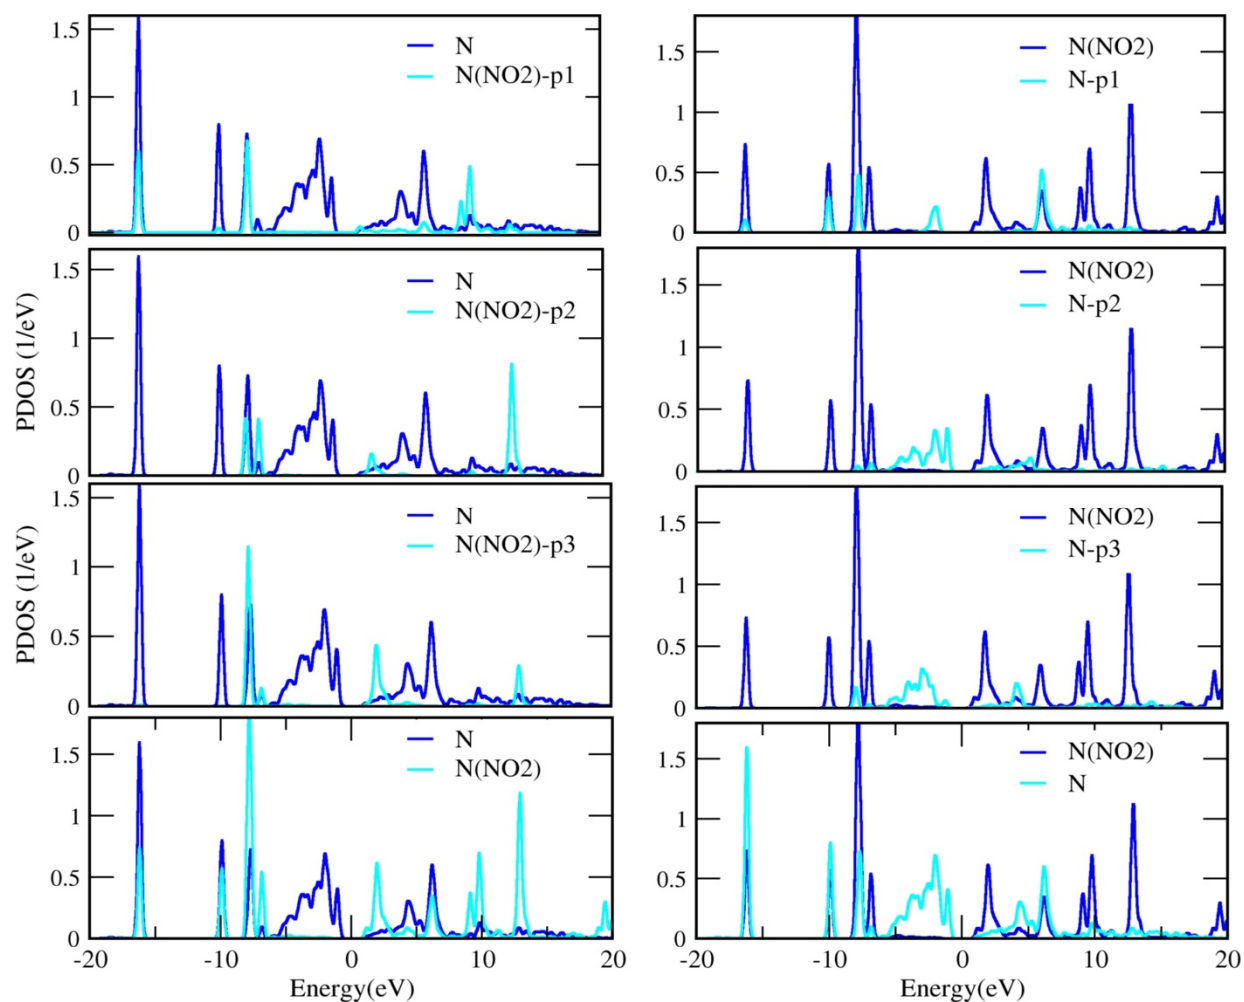

**Figure S9.** The projected density of states (PDOS) for two nitrogen atoms forming chemical bond at the interface and their three p orbitals for complex F (first column represents the PDOSs of the nitrogen atom of nanoparticle and different p orbitals of the nitrogen atom of NO<sub>2</sub> molecule, whereas the second column tells the PDOSs of the nitrogen atom of NO<sub>2</sub> molecule and p orbitals of the nitrogen atom of nanoparticle).



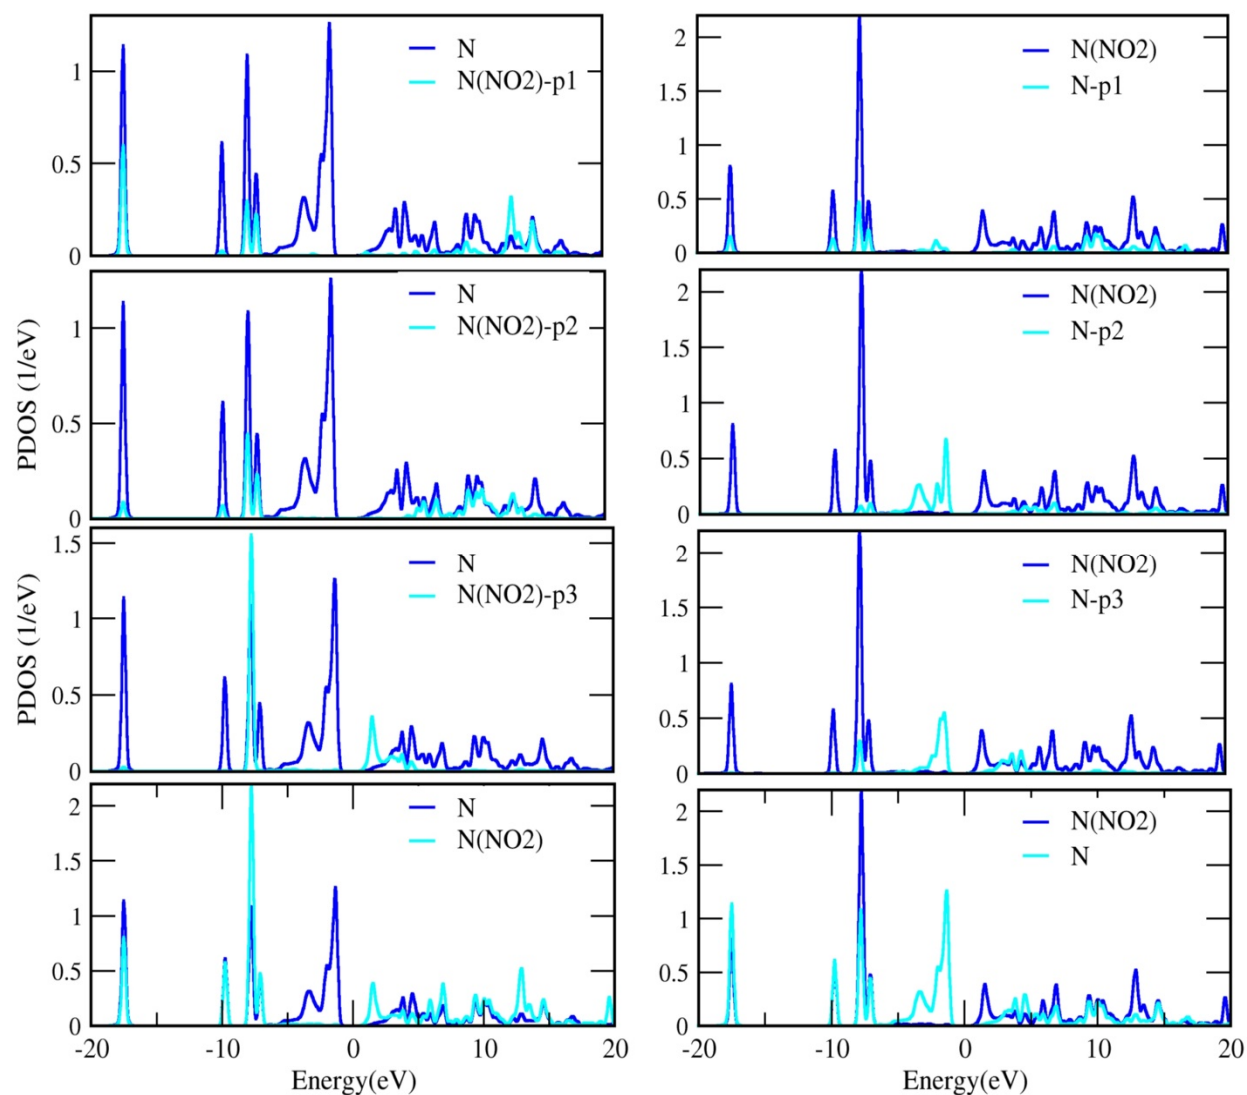

**Figure S10.** The projected density of states (PDOS) for two nitrogen atoms forming chemical bonds at the interface and their three p orbitals for complex H (the first and second columns represent the PDOSs of the nitrogen atoms of the NO<sub>2</sub> molecule and TiO<sub>2</sub> nanoparticle and their pertaining p orbitals).



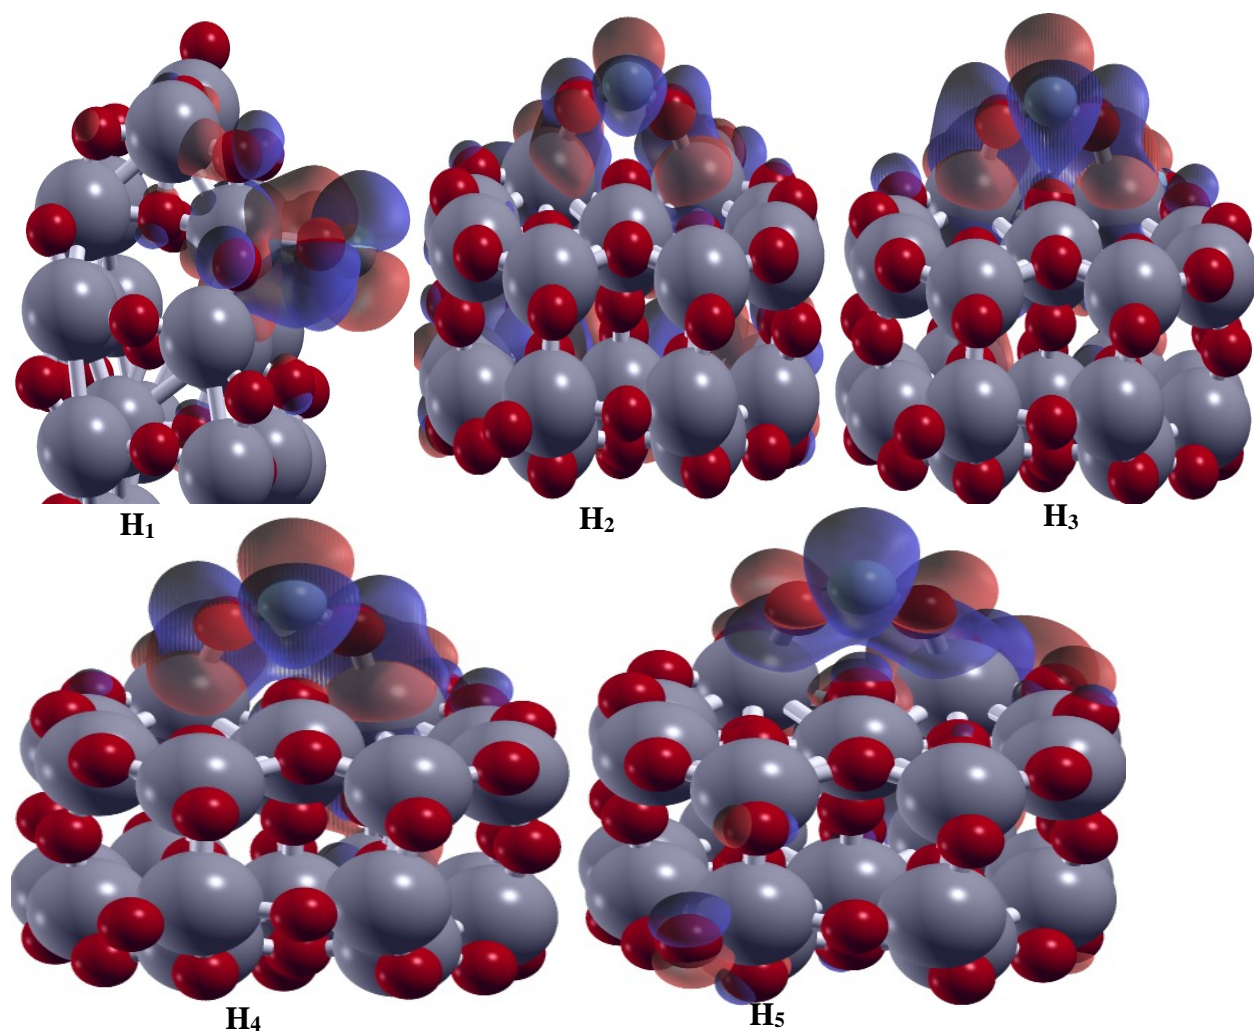

**Figure S11.** Isodensity surfaces of the highest occupied molecular orbitals (HOMO) for the NO<sub>2</sub> molecule adsorbed on the fivefold coordinated titanium sites of the TiO<sub>2</sub> nanoparticles. (H<sub>1</sub>) Complex J; (H<sub>2</sub>) Complex K; (H<sub>3</sub>) Complex L; (H<sub>4</sub>) Complex M; (H<sub>5</sub>) Complex N.

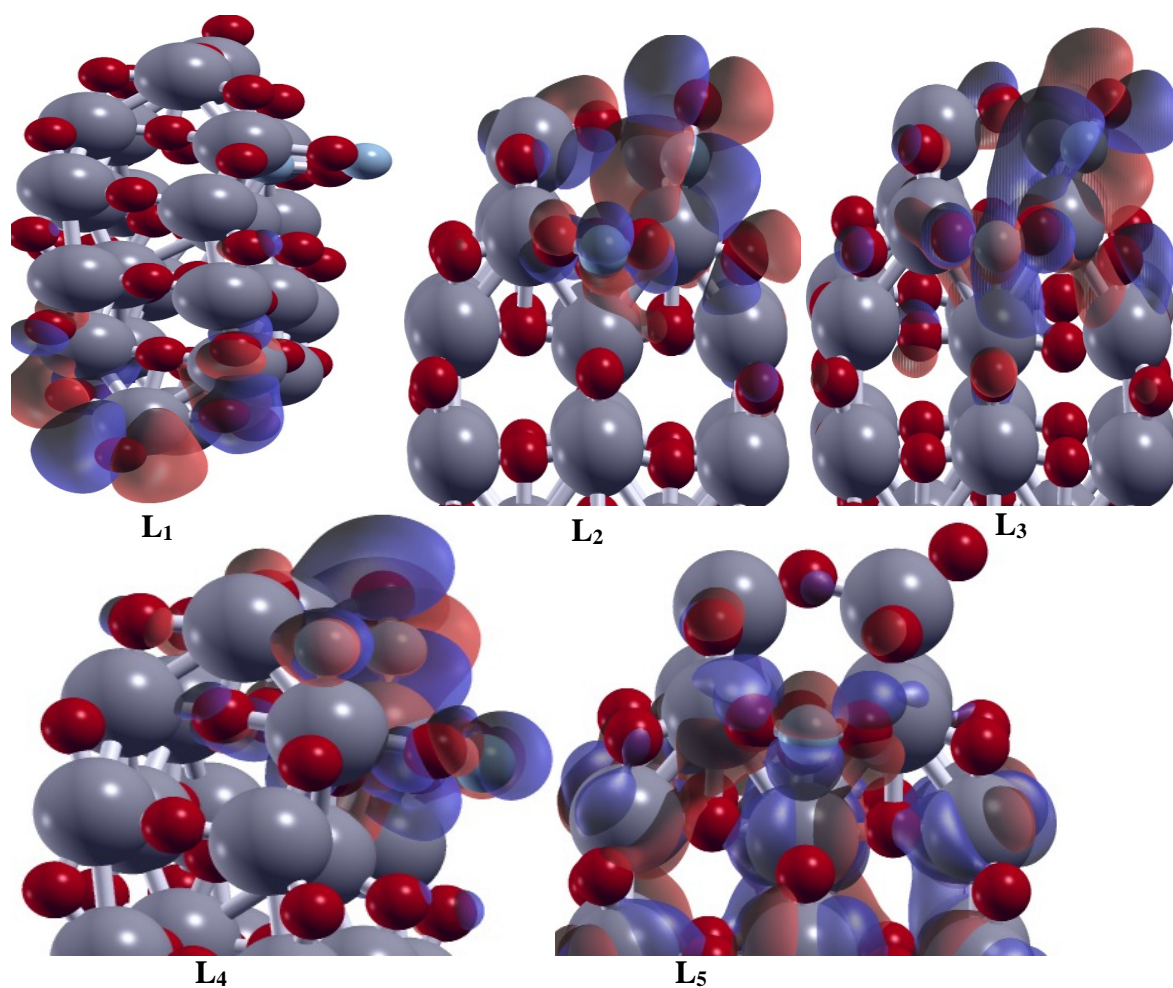

**Figure S12.** Isodensity surfaces of lowest unoccupied molecular orbitals (LUMO) for the NO<sub>2</sub> molecule adsorbed on the O<sub>B</sub> and doped nitrogen sites of the TiO<sub>2</sub> nanoparticles. (L<sub>1</sub>) Complex J; (L<sub>2</sub>) Complex K; (L<sub>3</sub>) Complex L; (L<sub>4</sub>) Complex M; (L<sub>5</sub>) Complex N.
